# Supplementary material for: Elevated systemic inflammatory responses, factors associated with physical and mental quality of life, and prognosis of hepatocellular carcinoma
Source: publisher site journal article supplement (doi:10.18632/aging.102889), 2020-03-07
Supplement: Supplementary file [file aging-v12i5-102889-supplementary-material-SD1.pdf]

**SUPPLEMENTARY FIGURES**

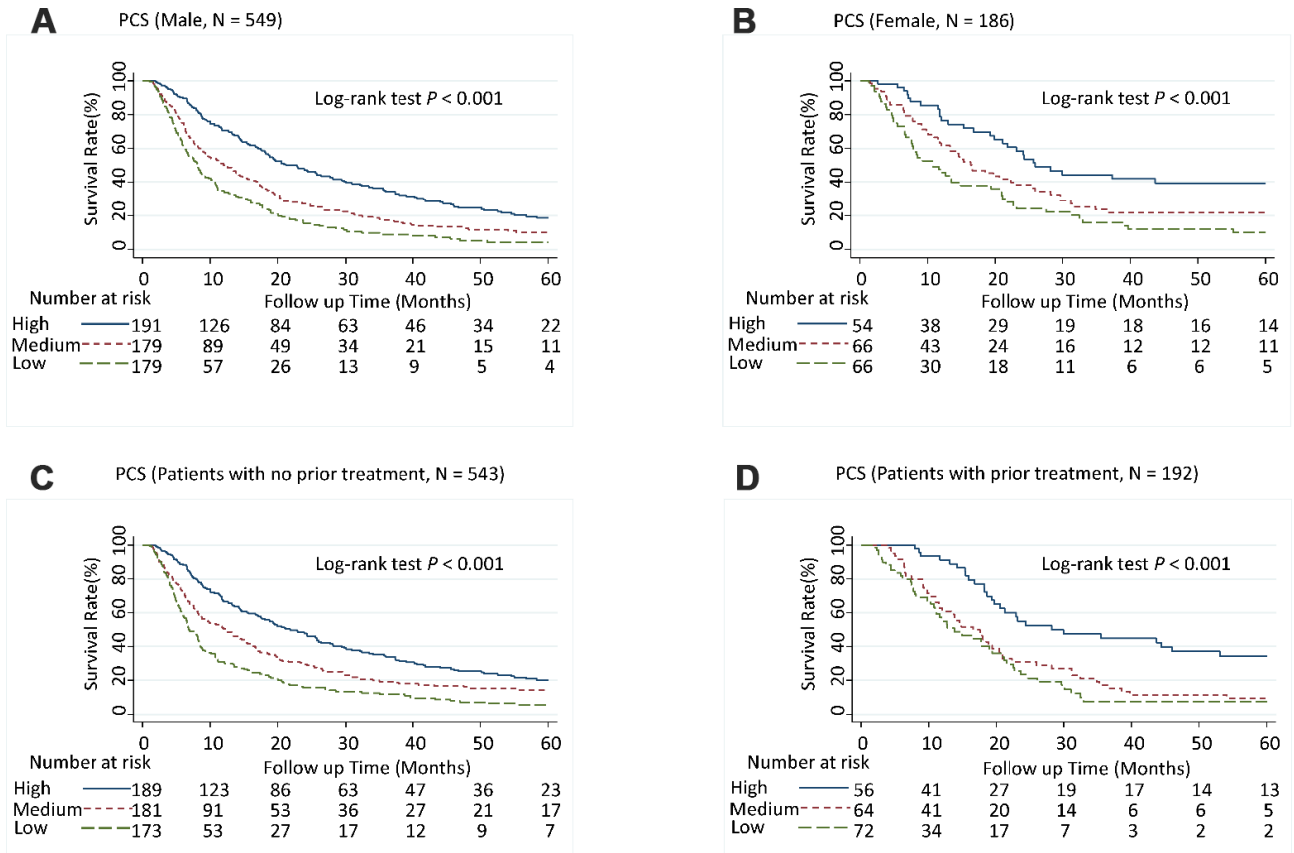

**Supplementary Figure 1. Five-year overall survival rates of hepatocellular carcinoma patients by Physical Component Summary (PCS) scores, stratified by sex and prior treatment history. (A) Male (N = 549), (B) Female (N = 186), (C) Patients with no prior treatment (N = 543), and (D) Patients with prior treatment (N = 192). PCS scores were categorized into tertiles; higher scores indicate a better physical quality of life. PCS: High,  $\geq 45.0$ ; Medium,  $\geq 30.5, < 45.0$ ; Low,  $< 30.5$ .**

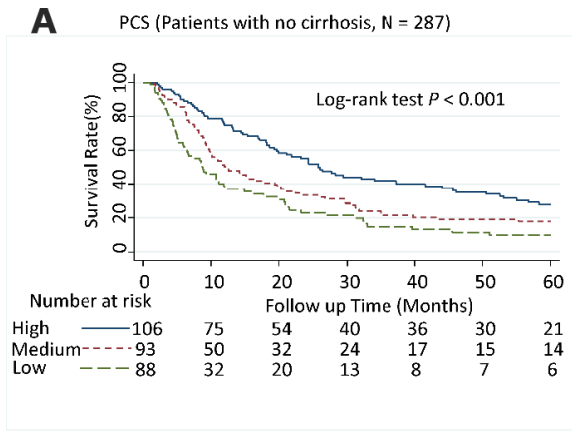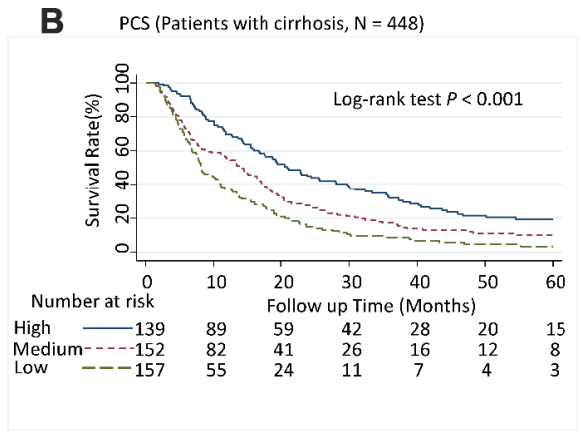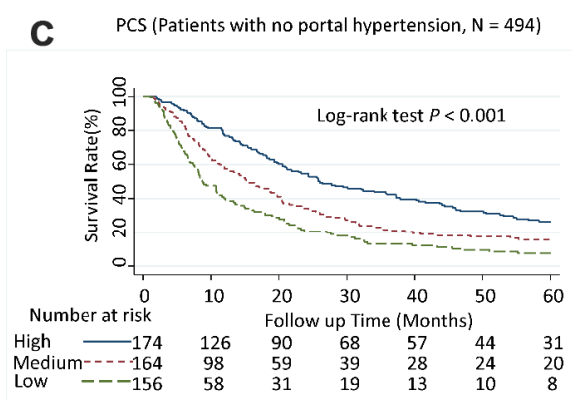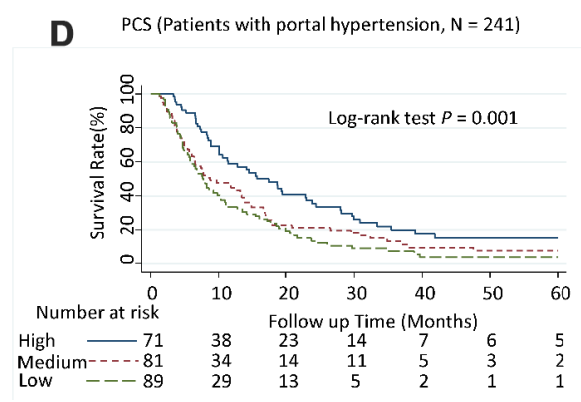

**Supplementary Figure 2. Five-year overall survival rates of hepatocellular carcinoma patients by Physical Component Summary (PCS) scores, stratified by cirrhosis and portal hypertension history.** (A) Patients with no cirrhosis (N = 287), (B) Patients with cirrhosis (N = 448), (C) Patients with no portal hypertension (N = 494), (D) Patients with portal hypertension (N = 241). PCS scores were categorized into tertiles; higher scores indicate a better physical quality of life. PCS: High,  $\geq 45.0$ ; Medium,  $\geq 30.5, < 45.0$ ; Low,  $< 30.5$ .
